# Supplementary material
Source: PubMed Central journal article supplement (PMC7116852)
Supplement: EMS117037-supplement-Supplemental_data.pdf [file EMS117037-supplement-Supplemental_data.pdf]

**Feasibility and validity of CT-derived fractional flow reserve in patients with severe aortic stenosis: the CAST-FFR study**

**SUPPLEMENTAL MATERIAL**

Michael Michail<sup>1,2</sup>, Abdul Rahman Ihdahid<sup>1</sup>, Andrea Comella<sup>1</sup>, Udit Thakur<sup>1</sup>, James D. Cameron<sup>1</sup>, Liam M. McCormick<sup>1</sup>, Robert Gooley<sup>1</sup>, Stephen J. Nicholls<sup>1</sup>, Anthony Mathur<sup>2,3</sup>, Alun D. Hughes<sup>2</sup>, Brian S. Ko<sup>1</sup>, Adam J. Brown<sup>1</sup>

<sup>1</sup>Monash Cardiovascular Research Centre, Monash University and MonashHeart, Monash Health, Melbourne, Australia

<sup>2</sup>Institute of Cardiovascular Science, University College London, London, United Kingdom

<sup>3</sup>Centre for Cardiovascular Medicine and Device Innovation, Queen Mary University of London, London, United Kingdom

**Correspondence:**

Dr Adam J. Brown

Monash Cardiovascular Research Centre and MonashHeart, Monash Health,  
246 Clayton Road, Melbourne, Victoria 3168, Australia

Email: adam.brown@me.com | Tel: +61 3 9594 6666 | Fax: +61 3 9594 6939

**TABLE S1: SUBGROUP ANALYSIS OF DIAGNOSTIC PERFORMANCE OF CT-  
FFR ACCORDING TO CT CALCIUM SCORE ON A PER VESSEL BASIS**

|                                       | Low calcium score | High calcium score | p value |
|---------------------------------------|-------------------|--------------------|---------|
| n                                     | 30                | 30                 |         |
| Mean calcium score,<br>Agatston units | 123.1 ± 94.2      | 735.3 ± 566.5      |         |
| Pearson's rank                        | 0.85, p<0.0001    | 0.61, p = 0.0004   |         |
| True positive                         | 7                 | 10                 |         |
| False positive                        | 4                 | 4                  |         |
| True negative                         | 16                | 13                 |         |
| False negative                        | 3                 | 3                  |         |
|                                       |                   |                    |         |
| Sensitivity %                         | 70.0              | 76.9               |         |
| Specificity %                         | 80.0              | 76.5               |         |
| PPV %                                 | 63.6              | 71.4               |         |
| NPV %                                 | 84.2              | 81.2               |         |
| Accuracy %                            | 76.7              | 86.7               |         |
| ROC AUC (95% CI)                      | 0.83 (0.67-0.98)  | 0.82 (0.66-0.99)   | 0.94    |

Values are presented as n (%) or mean ± SD. NPV; negative predictive value; PPV, positive predictive value;

ROC AUC, area under the receiver-operating characteristic curve.

**TABLE S2: SUBGROUP ANALYSIS OF DIAGNOSTIC PERFORMANCE OF CT-  
FFR ACCORDING TO TOTAL CT CALCIUM SCORE ON A PER PATIENT BASIS**

|                                       | Low calcium score | High calcium score | p value |
|---------------------------------------|-------------------|--------------------|---------|
| n                                     | 20                | 19                 |         |
| Mean calcium score,<br>Agatston units | 514.8 ± 320.3     | 2277.1 ± 1518.7    |         |
| Pearson's rank                        | 0.82 p<0.0001     | 0.63, p = 0.0037   |         |
| True positive                         | 5                 | 8                  |         |
| False positive                        | 2                 | 3                  |         |
| True negative                         | 10                | 7                  |         |
| False negative                        | 3                 | 1                  |         |
|                                       |                   |                    |         |
| Sensitivity %                         | 62.5              | 88.9               |         |
| Specificity %                         | 83.3              | 70.0               |         |
| PPV %                                 | 71.4              | 72.7               |         |
| NPV %                                 | 76.9              | 87.5               |         |
| Accuracy %                            | 75.0              | 78.9               |         |
| ROC AUC (95% CI)                      | 0.77 (0.52-1.0)   | 0.80 (0.58-1.0)    | 0.84    |

Values are presented as n (%) or mean ± SD. NPV; negative predictive value; PPV, positive predictive value;

ROC AUC, area under the receiver-operating characteristic curve.
